# Supplementary material for: Unhealthy Food at Your Fingertips: Cross-Sectional Analysis of the Nutritional Quality of Restaurants and Takeaway Outlets on an Online Food Delivery Platform in New Zealand
Source: MDPI journal article supplement (doi:10.3390/nu14214567), 2022-10-30
Supplement: s1 [file s1]

**Supplementary Table S1.** Proportion of Discretionary and FFG for Combination menu items on Uber Eats. The proportion of food and beverage categories as part of combination menu items in popularized (N = 442 unique combination menu items) and regular (n = 3304 unique combination menu items) menu items from 305 unique local independent and franchise takeaway outlets. Regular menu items exclude popularized menu items.

| Type of Category          | Food Categories                             | Popularized Menu Items |             | Regular Menu Items |             |
|---------------------------|---------------------------------------------|------------------------|-------------|--------------------|-------------|
|                           |                                             | n                      | %           | n                  | %           |
| Discretionary             | Fried Potato (or similar)                   | 289                    | 65.4        | 1752               | 53.0        |
|                           | Cereal-based mixed meal                     | 226                    | 51.1        | 1577               | 47.7        |
|                           | Meat or alternative based mixed meal        | 151                    | 34.2        | 1298               | 39.3        |
|                           | Sugar Sweetened Beverages                   | 79                     | 17.9        | 543                | 16.4        |
|                           | Baked goods/Desserts (homemade or similar)  | 87                     | 19.7        | 159                | 4.8         |
|                           | Other Beverage <sup>b</sup>                 | 110                    | 24.9        | 170                | 5.1         |
|                           | Vegetable-based mixed meal                  | 39                     | 8.8         | 347                | 10.5        |
|                           | Discretionary Milk Based Beverages          | 0                      | 0           | 0                  | 0           |
|                           | Savoury Sauces, Condiments and Spreads      | 117                    | 26.5        | 893                | 27.0        |
|                           | Iced confectionary and dairy-based desserts | 76                     | 17.2        | 157                | 4.8         |
|                           | Other Food <sup>a</sup>                     | 2                      | 0.5         | 45                 | 1.4         |
|                           | <b>Total Discretionary (n)</b>              | <b>1176</b>            | <b>90.0</b> | <b>6941</b>        | <b>81.1</b> |
| Five Food Groups<br>(FFG) | Cereal-based mixed meal                     | 9                      | 2.0         | 202                | 6.1         |
|                           | Meat or alternative based mixed meal        | 24                     | 5.4         | 131                | 4.0         |
|                           | Other Beverage <sup>d</sup>                 | 0                      | 0           | 18                 | 0.5         |
|                           | Vegetable-based mixed meal                  | 34                     | 7.7         | 130                | 3.9         |
|                           | Other Food <sup>c</sup>                     | 61                     | 13.8        | 609                | 18.4        |
|                           | Water                                       | 2                      | 0.5         | 429                | 13.0        |
|                           | Juice                                       | 0                      | 0           | 102                | 3.1         |
|                           | <b>Total FFG (n)</b>                        | <b>130</b>             | <b>10.0</b> | <b>1621</b>        | <b>18.9</b> |
|                           | <b>Total (n)</b>                            | <b>1306</b>            |             | <b>8562</b>        |             |
|                           | <b>Total Unique Combination menu items</b>  | <b>442</b>             |             | <b>3304</b>        |             |

<sup>a</sup>Confectionery, Discretionary snack food (Savoury) – Packaged, Discretionary snack food (Sweet) – Packaged, Other snack food (other), Processed Meats, <sup>b</sup>Alcohol, Energy Drinks, Non-Sugar Sweetened Beverages, Rehydration Beverages (Electrolytes), Water Based Flavoured Beverage – sugar not determined, <sup>c</sup>Breads and Cereals, Dairy and alternatives, Fats/Oils, Fruit, Legumes, Meat and Alternatives, Soup, Vegetables, Vegetables (Other), <sup>d</sup>Body Building and Performance Beverages, Coffee, Milk/Milk Alternatives, Milk/Milk Alternative Based Beverages, Tea. % The percentages are out of total unique combination meals.
